# Supplementary material for: The Uptake of Actinides by Hardened Cement Paste in High-Salinity Pore Water
Source: MDPI journal article supplement (doi:10.3390/min13111380), 2023-10-28
Supplement: s1 [file s1]

Archive with 1 entries (1 files):
- minerals-2521090-Supplementary.pdf
